# Supplementary material for: Exogenous Serotonin (5-HT) Promotes Mesocotyl and Coleoptile Elongation in Maize Seedlings under Deep-Seeding Stress through Enhancing Auxin Accumulation and Inhibiting Lignin Formation
Source: MDPI journal article supplement (doi:10.3390/ijms242317061), 2023-12-02
Supplement: s1 [file s1]

**Table S1.** Mitigation effect index (MEI) of all traits in ly119-2 seedlings.

| MEI (Trait)                                               | ly119-2 |        |        |        |        | CV (%) |
|-----------------------------------------------------------|---------|--------|--------|--------|--------|--------|
|                                                           | T1      | T2     | T3     | T4     | T5     |        |
| MEI (Mesocotyl length)                                    | 0.157   | 0.137  | 0.608  | 1.118  | 0.039  | 109.72 |
| EI (Coleoptile length)                                    | 0.700   | 1.200  | 1.500  | 2.400  | 1.300  | 43.81  |
| MEI (Mesocotyl and coleoptile total length)               | 0.246   | 0.311  | 0.590  | 1.033  | 0.246  | 69.58  |
| MEI (Mesocotyl-to-coleoptile ratio)                       | -0.117  | -0.286 | -0.150 | -0.133 | -0.391 | 55.21  |
| MEI (Mesocotyl coarse)                                    | 1.736   | 1.483  | 2.195  | 1.529  | 2.046  | 17.47  |
| MEI (Coleoptile coarse)                                   | 2.111   | 2.500  | 3.204  | 1.796  | 3.667  | 29.07  |
| MEI (Seedling length)                                     | 0.600   | 0.273  | 1.164  | 1.636  | 1.418  | 55.84  |
| MEI (Seedling weight)                                     | 0.171   | -0.326 | 0.813  | 1.039  | 0.908  | 111.23 |
| MEI (Mesocotyl weight)                                    | 0.906   | 0.503  | 1.133  | 1.136  | 0.181  | 54.30  |
| MEI (Coleoptile weight)                                   | 2.294   | 5.711  | 10.965 | 9.871  | 15.565 | 57.26  |
| MEI (Seeding emergence rate)                              | 0.000   | 0.050  | 0.600  | 0.950  | 0.300  | 104.69 |
| MEI (IAA content in mesocotyl)                            | 0.608   | 0.378  | 1.040  | 2.540  | 0.175  | 99.79  |
| MEI (IAA content in coleoptile)                           | 0.838   | 2.235  | 2.426  | 3.000  | 2.059  | 37.65  |
| MEI (H <sub>2</sub> O <sub>2</sub> content in mesocotyl)  | 0.194   | 0.215  | 0.500  | 1.048  | 0.098  | 94.01  |
| MEI (H <sub>2</sub> O <sub>2</sub> content in coleoptile) | 0.271   | 0.449  | 1.063  | 0.821  | 0.562  | 49.32  |
| MEI (Lignin content in mesocotyl)                         | 0.592   | 0.469  | 1.184  | 2.041  | 0.163  | 83.46  |
| MEI (Lignin content in coleoptile)                        | 0.392   | 0.536  | 0.505  | 0.948  | 0.412  | 40.45  |

CK(+): 3 cm seeding depth + 0 mg/L serotonin (5-HT) application, CK(-): 20 cm seeding depth + 0 mg/L 5-HT application, T1: 20 cm seeding depth + 1.0 mg/L 5-HT application, T2: 20 cm seeding depth + 1.5 mg/L 5-HT application, T3: 20 cm seeding depth + 2.0 mg/L 5-HT application, T4: 20 cm seeding depth + 2.5 mg/L 5-HT application, T5: 20 cm seeding depth + 3.0 mg/L 5-HT application. CV (%): coefficient of variation. H<sub>2</sub>O<sub>2</sub>: hydrogen peroxide; IAA: indole-3-acetic acid. CV: coefficient of variation.

**Table S2.** Mitigation effect index (MEI) all traits in ZRX87-1 seedlings.

| MEI (Trait)                                               | ZRX87-1 |        |        |        |        | CV (%)  |
|-----------------------------------------------------------|---------|--------|--------|--------|--------|---------|
|                                                           | T1      | T2     | T3     | T4     | T5     |         |
| MEI (Mesocotyl length)                                    | 0.141   | 0.109  | 0.598  | 0.793  | -0.228 | 144.92  |
| MEI (Coleoptile length)                                   | 2.167   | 4.000  | 17.000 | 18.667 | 2.333  | 93.60   |
| MEI (Mesocotyl and coleoptile total length)               | 0.265   | 0.347  | 1.602  | 1.888  | -0.071 | 108.79  |
| MEI (Mesocotyl-to-coleoptile ratio)                       | -0.096  | -0.275 | -0.740 | -0.699 | -0.411 | 62.00   |
| MEI (Mesocotyl coarse)                                    | 0.530   | 0.365  | 0.641  | 0.398  | 0.044  | 56.92   |
| MEI (Coleoptile coarse)                                   | 0.971   | 1.049  | 0.473  | 0.778  | 0.481  | 35.77   |
| MEI (Seedling length)                                     | 0.523   | 0.826  | 1.965  | 2.326  | 0.512  | 69.44   |
| MEI (Seedling weight)                                     | 0.309   | 0.747  | 2.941  | 2.962  | -0.205 | 110.02  |
| MEI (Mesocotyl weight)                                    | 1.645   | 2.909  | 5.573  | 7.371  | 0.692  | 76.35   |
| MEI (Coleoptile weight)                                   | 0.303   | 1.876  | 4.469  | 4.475  | -2.035 | 153.73  |
| MEI (Seeding emergence rate)                              | 0.000   | 0.000  | 0.150  | 0.500  | 0.000  | 166.77  |
| MEI (IAA content in mesocotyl)                            | 0.108   | -0.026 | 0.508  | 1.013  | -0.521 | 266.85  |
| MEI (IAA content in coleoptile)                           | 0.500   | 0.707  | 1.879  | 3.138  | 0.103  | 97.85   |
| MEI (H <sub>2</sub> O <sub>2</sub> content in mesocotyl)  | 0.226   | 0.152  | 0.154  | 0.271  | -0.702 | 2014.10 |
| MEI (H <sub>2</sub> O <sub>2</sub> content in coleoptile) | 0.069   | 0.333  | 0.900  | 1.034  | 0.060  | 96.21   |
| MEI (Lignin content in mesocotyl)                         | 0.283   | 0.087  | 0.739  | 1.413  | 0.413  | 88.44   |
| MEI (Lignin content in coleoptile)                        | 1.500   | 3.000  | 11.375 | 13.250 | 1.625  | 92.60   |

CK(+): 3 cm seeding depth + 0 mg/L serotonin (5-HT) application, CK(-): 20 cm seeding depth + 0 mg/L 5-HT application, T1: 20 cm seeding depth + 1.0 mg/L 5-HT application, T2: 20 cm seeding depth + 1.5 mg/L 5-HT application, T3: 20 cm seeding depth + 2.0 mg/L 5-HT application, T4: 20 cm seeding depth + 2.5 mg/L 5-HT application, T5: 20 cm seeding depth + 3.0 mg/L 5-HT application. CV (%): coefficient of variation. H<sub>2</sub>O<sub>2</sub>: hydrogen peroxide; IAA: indole-3-acetic acid. CV: coefficient of variation.

**Table S3.** Primers sequences and functional annotation of eight candidate genes used for quantitative real-time PCR (qRT-PCR) analysis.

| Gene ID (Encoded protein)                                                        | Gene position                             | Primer Sequence (5' to 3')                          | Gene functional annotation                                                                                                                              |
|----------------------------------------------------------------------------------|-------------------------------------------|-----------------------------------------------------|---------------------------------------------------------------------------------------------------------------------------------------------------------|
| <i>Zm00001d010159</i><br>(Actin 1)                                               | Chromosome 8<br>(102413768–102417536 bp)  | F: CGATTGAGCATGGCATTGTCA<br>R: CCCACTAGCGTACAACGAA  | ATP binding (GO:0005524); nucleotide binding (GO:0000166); cytoskeleton (GO:0005856)                                                                    |
| <i>Zm00001d049601</i><br>(Tryptophan decarboxylase 1)                            | Chromosome 4<br>(36911317–36913087 bp)    | F: CAAGCTCTGGATGGTCATGC<br>R: TGATCCTGAAGCACACGAGA  | Aromatic-L-amino-acid decarboxylase activity (GO:0004058); Cellular amino acid metabolic process (GO:0006520); Pyridoxal phosphate binding (GO:0030170) |
| <i>Zm00001d039346</i><br>(Probable indole–3–acetic acid–amido synthetase GH3.12) | Chromosome 3<br>(2194864–2198030 bp)      | F: TCGGTGAGCATTACGAGGTC<br>R: GCTCGCTGTTCTTGTCGATG  | Response to light stimulus (GO:0009416); Response to auxin (GO:0009733); Ligase activity (GO:0016874)                                                   |
| <i>Zm00001d026530</i><br>(Indole–3–acetic acid–induced protein ARG7)             | Chromosome 10<br>(147742692–147744167 bp) | F: AAGATCCGGTCCATCGTGTC<br>R: GAACCCGTACTCCTCCTCC   | Response to auxin (GO:0009733)                                                                                                                          |
| <i>Zm00001d049659</i><br>(Auxin–induced protein 15A)                             | Chromosome 4<br>(38968832–38969823 bp)    | F: AGCAGCTGATGACGAGGC<br>R: GAACTCGTCCTCCACCCG      | Response to auxin (GO:0009733)                                                                                                                          |
| <i>Zm00001d016471</i><br>(Trans–cinnamate 4–monooxygenase)                       | Chromosome 5<br>(163692318–163694217 bp)  | F: CAACTACGGCGACTTCATCC<br>R: CGTTGATGTTCTCGACGATGT | Monooxygenase activity (GO:0004497); oxidoreductase activity, acting on paired donors, with incorporation or reduction of molecular oxygen (GO:0016705) |
| <i>Zm00001d005998</i><br>(Caffeoyl–CoA O–methyltransferase 1)                    | Chromosome 2<br>(194954891–194956278 bp)  | F: GCAGCTCCTGATCGAGATTC<br>R: GCGACCCTATCTGGTCGTAG  | O-methyltransferase activity (GO:0008171); S-adenosylmethionine-dependent methyltransferase activity (GO:0008757); methylation (GO:0032259)             |
| <i>Zm00001d032152</i><br>(cinnamoyl CoA reductase1)                              | Chromosome 1<br>(214573400–214579274 bp)  | F: GCTGCTCGAGAAGGGATACAC<br>R: CGGGTCATCTGCTGCCAT   | Circadian rhythm (GO:0007623); response to cold (GO:0009409); lignin biosynthetic process (GO:0009809); cinnamoyl-CoA reductase activity (GO:0016621)   |
| <i>Zm00001d053554</i><br>(Peroxidase)                                            | Chromosome 4<br>(233852931–233854306 bp)  | F: GCCCTCTTCGCCTCAGACTT<br>R: TCAGCTGCTGTTGACCACCC  | Peroxidase activity (GO:0004601); Response to oxidative stress (GO:0006979); heme binding (GO:0020037)                                                  |
